# Supplementary material for: Protective effect of antioxidant rich aqueous curry leaf (Murraya koenigii) extract against gastro-toxic effects of piroxicam in male Wistar rats
Source: PubMed Central journal article supplement — Toxicol Rep. 2014 Jul 2;1:987–1003. doi: 10.1016/j.toxrep.2014.06.007 (PMC5598401; doi:10.1016/j.toxrep.2014.06.007), 2014-07-02

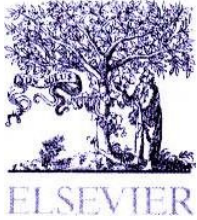

*Toxicology Reports*  
Conflict of Interest Policy

Supplement:

Article Title: **Protective effect of antioxidant rich aqueous curry leaf (*Murraya koenigii*) extract against gastro-toxic effects of piroxicam in male Wistar rats.**

Author name: **Syed Benazir Firdaus, Debosree Ghosh, Aindrila Chattyopadhyay, Mousumi Dutta, Sudeshna Paul, Jagannath Jana, Anjali Basu, Gargi Bose, Hiya Lahiri, Bhaswati Banerjee, Sanjib Kumar Pattari, Subhrangsu Chatterjee, Kuladip Jana, Debasish Bandyopadhyay.**

Declarations

*Toxicology Reports* requires that all authors sign a declaration of conflicting interests. If you have nothing to declare in any of these categories then this should be stated.

Conflict of Interest

A conflicting interest exists when professional judgement concerning a primary interest (such as patient's welfare or the validity of research) may be influenced by a secondary interest (such as financial gain or personal rivalry). It may arise for the authors when they have financial interest that may influence their interpretation of their results or those of others. Examples of potential conflicts of interest include employment, consultancies, stock ownership, honoraria, paid expert testimony, patent applications/registrations, and grants or other funding.

Please state any competing interests

Authors have no competing interest.

FunZling Source

All sources of funding should also be acknowledged and you should declare any involvement of study sponsors in the study design; collection, analysis and interpretation of data; the writing of the manuscript; the decision to submit the manuscript for publication. If the study sponsors had no such involvement, this should be stated.

Please state any sources of funding for your research

The University of Calcutta.

Signature (a scanned signature is acceptable, but each author must sign)

Print name

*Syed Benazir Firdaus*

SYED BENAZIR FIRDAUS

*Debosree Ghosh*

DEBOSREE GHOSH

*Aindrila Chattopadhyay*

AINDRILA CHATTOPADHYAY

*Mousumi Dutta*

MOUSUMI DUTTA

*Sudeshna Paul*

SUDESHNA PAUL

*Jagannath Jana*

JAGANNATH JANA

*Anjali Basu*

ANJALI BASU

*Gargi Bose*

GARGI BOSE

*Hiya Lahiri*

HIYA LAHIRI

*Bhaswati Banerjee*

BHASWATI BANERJEE

*Sanjib Kumar Pattari*

SANJIB KUMAR PATTARI

*Subhrangsu Chatterjee*

SUBHRANGSU CHATTERJEE

*Kuladip Jana*

KULADIP JANA

*Debasish Bandyopadhyay*

DEBASISH BANDYOPADHYAY

*Debasish Bandyopadhyay*

Corresponding Author

*Dr. Debasish Bandyopadhyay*  
Associate Professor  
Oxidative Stress and Free  
Radical Biology Laboratory  
Department of Physiology  
University of Calcutta  
92, A.P.C. Road, Kolkata-700009

Oxidative Stress and  
Free Radical Biology  
Laboratory  
Dept. of Physiology  
University of Calcutta

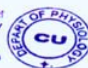

Supplement: mmc1.pdf [file mmc1.pdf]
